# Supplementary material for: Robust IL-2-dependent antitumor immunotherapy requires targeting the high-affinity IL-2R on tumor-specific CD8+ T cells
Source: HighWire-hosted journal article supplement (doi:10.1136/jitc-2022-006611), 2023-06-01
Supplement: jitc-2022-006611supp001_data_supplement.pdf [file jitc-2022-006611supp001_data_supplement.pdf]

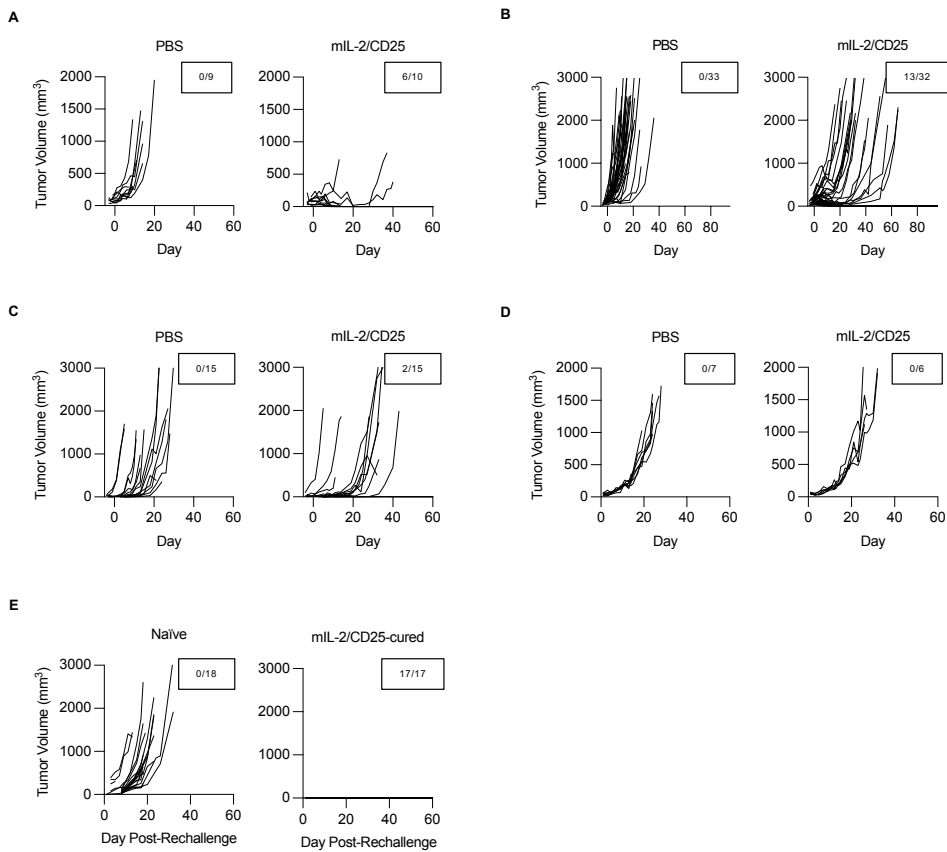

**Fig. S1. HD mIL-2/CD25 delays tumor growth in immunogenic tumor models.** (A-E) Animals were inoculated with tumors and treated as described in Fig. 1. Tumor growth curves are shown for individual animals treated with either PBS (left) or mIL-2/CD25 (right) in the (A) MC38 model, (B) CT26 model, (C) B16.F10 model, and (D) 4T1 model. (E) Rechallenge experiments were performed as described in Fig. 1 and tumor growth curves are shown. For all tumor growth curves, the number of surviving mice out of the total is shown. MC38 data (n=9-10/group) were pooled from 2 independent experiments. CT26 data (n=32-33/group) were pooled from 5 independent experiments. B16.F10 data (n=15/group) were pooled from 3 independent experiments. 4T1 data (n=6-7/group) were pooled from 2 independent experiments. CT26 rechallenge data (n=17-18/group) were pooled from 4 independent experiments.

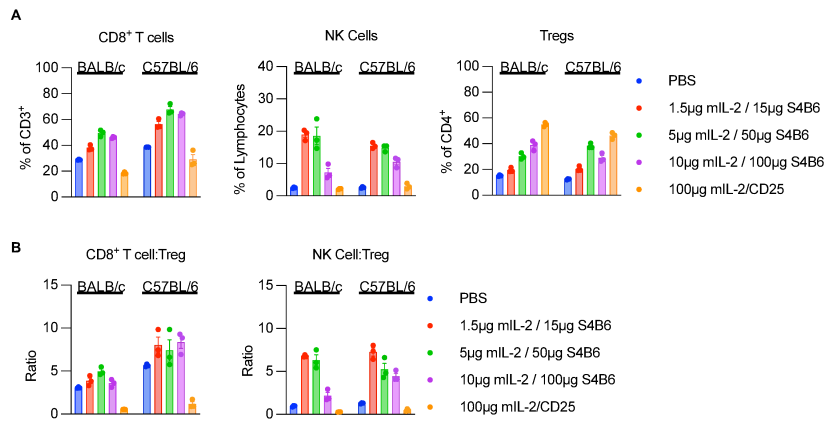

**Fig. S2. The effects of different doses of S4B6-IL2/IC on CD8<sup>+</sup> T cells, Tregs, and NK cells.** (A) BALB/c and C57BL/6 mice were injected i.p. with various doses of IL-2 complexed with anti-IL-2 clone S4B6, as indicated, compared to PBS and 100 μg mL-2/CD25. Animals were euthanized 72 hours post-injection and splenocytes were analyzed by flow cytometry. Data shows frequencies of CD8<sup>+</sup> T cells, NK cells, and Tregs in both strains. (B) CD8<sup>+</sup> T cell to Treg ratios and NK cell to Treg ratios from this experiment are shown. NK cells were defined by CD3<sup>+</sup>CD11b<sup>+</sup>Ly6G<sup>+</sup>CD49b<sup>+</sup> in BALB/c mice and CD3<sup>+</sup>NK1.1<sup>+</sup> in C57BL/6 mice. Data (n=3/group) are representative of 1 experiment. Error bars represent mean ± SD.

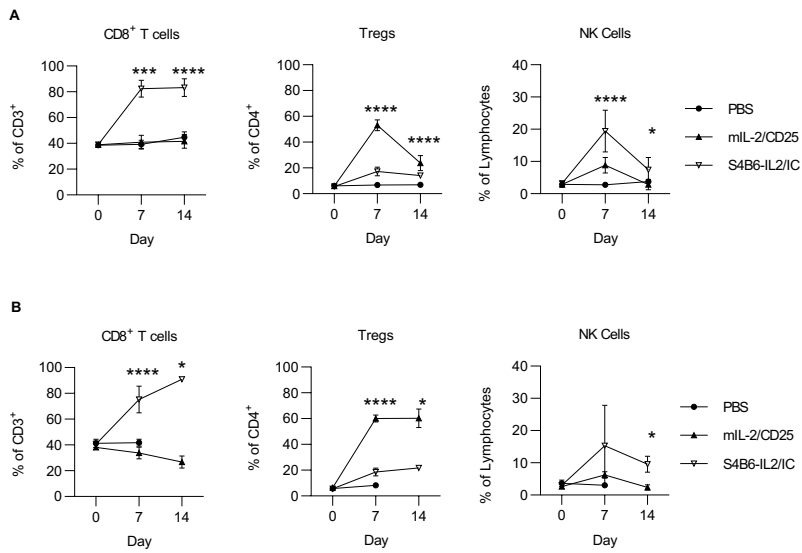

**Fig. S3. Expansion of IL-2-targeted cells in the MC38 and B16.F10 models.** Tumor-bearing C57BL/6 animals were treated as described in Fig. 2. (A) Frequencies of CD8<sup>+</sup> T cells, Tregs, and NK cells are shown for PBMCs collected from MC38-bearing mice. (B) Frequencies of CD8<sup>+</sup> T cells, Tregs, and NK cells are shown for PBMCs collected from B16.F10-bearing mice. Blood data for MC38 (n=5-9/group) and B16.F10 (n=7-8/group) were each pooled from 2 independent experiments and analyzed at each timepoint via Kruskal-Wallis test multiple comparison test. Error bars represent mean  $\pm$  SD.

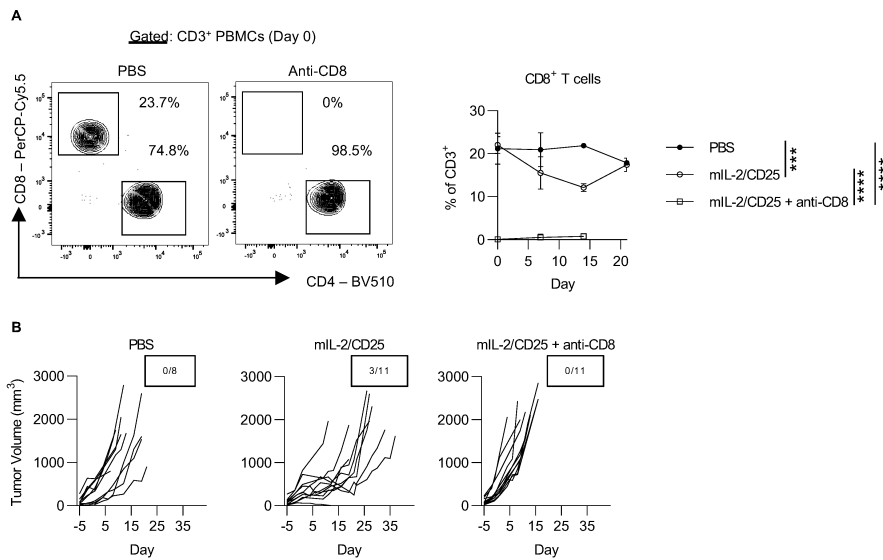

**Fig. S4. CD8<sup>+</sup> T cell depletion inhibits the mIL-2/CD25-induced antitumor response.** CT26-bearing BALB/c mice were depleted of T cells and treated as described in Fig. 1. PBMCs were collected before, during, and after treatment in order to verify depletion by flow cytometry. **(A)** Data shows representative flow plots of CD4<sup>+</sup> and CD8<sup>+</sup> T cells after gating on CD3<sup>+</sup> T cells in the PBMCs collected on D0. The frequency of CD8<sup>+</sup> T cells of the CD3<sup>+</sup> T cell population is quantified in the blood over time. Data (n=8/11/group) were analyzed via one-way ANOVA with Tukey's multiple comparison test of the AUC. Error bars represent mean  $\pm$  SD. **(B)** Tumor curves are shown for the depletion experiments.

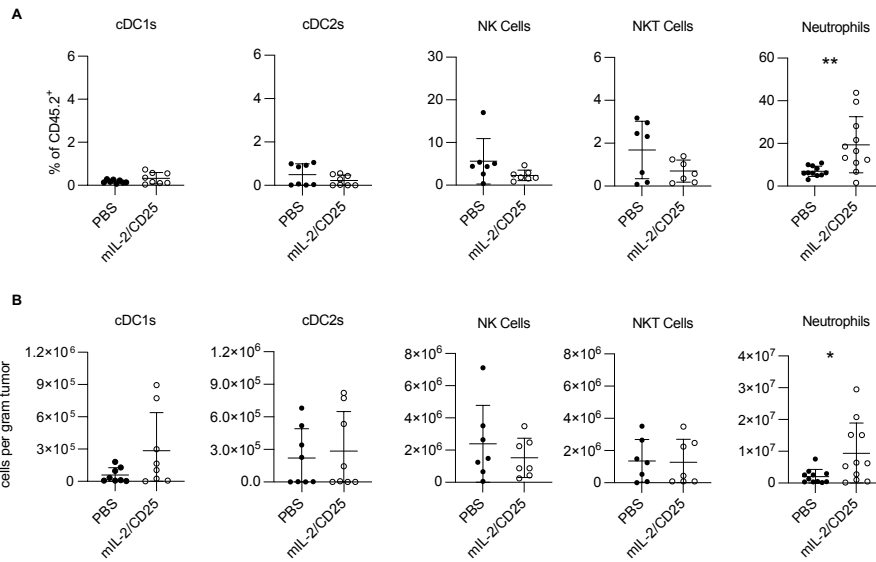

**Fig. S5. The antitumor effects of mIL-2/CD25 do not act significantly through the non-T cell compartment.** (A-B) The CT26 TME was analyzed as described in Fig. 3. Frequencies (A) out of the total tumor-associated immune population (CD45.2<sup>+</sup>) and cell numbers per gram tumor (B) are shown. Type 1 conventional dendritic cells (cDC1s) were defined as live CD45.2<sup>+</sup>CD11b<sup>-</sup>CD11c<sup>+</sup>MHC CII<sup>+</sup>CD8<sup>+</sup>CD4<sup>-</sup> cells. Type 2 conventional dendritic cells (cDC2s) were defined as live CD45.2<sup>+</sup>CD11b<sup>-</sup>CD11c<sup>+</sup>MHC CII<sup>+</sup>CD8<sup>-</sup>CD4<sup>+</sup> cells. NK cells were defined as live CD45.2<sup>+</sup>CD3<sup>-</sup>CD11b<sup>-</sup>Ly6G<sup>-</sup>CD49b<sup>+</sup> cells. NKT cells were defined as live CD45.2<sup>+</sup>CD3<sup>+</sup>CD11b<sup>-</sup>Ly6G<sup>-</sup>CD49b<sup>+</sup> cells. Neutrophils are defined as live CD45.2<sup>+</sup>CD3<sup>-</sup>CD11b<sup>-</sup>Ly6G<sup>+</sup>CD49b<sup>-</sup> cells. Data (n=7-11/group) were pooled from 3 experiments and analyzed by Mann-Whitney test. Error bars represent mean  $\pm$  SD.

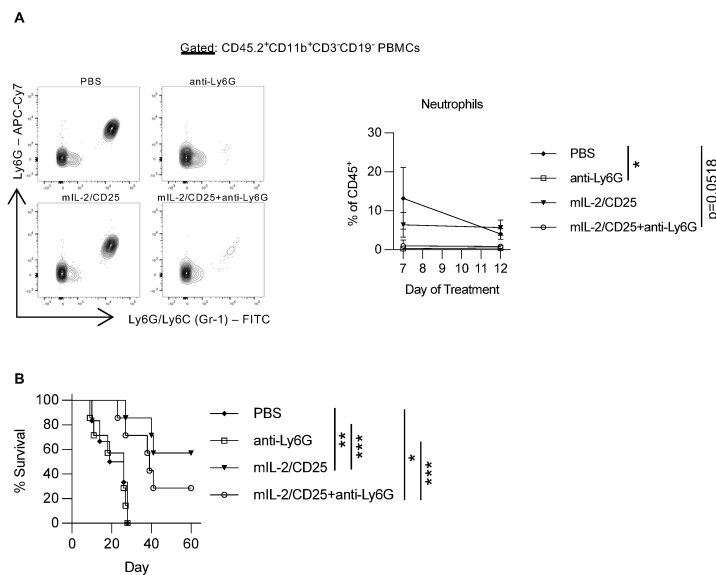

**Fig. S6. Verification of Neutrophil depletion during therapy.** CT26-bearing animals were depleted of Neutrophils via anti-Ly6G clone 1A8 throughout therapy. (A) Representative flow plots show both Ly6G and Gr-1 staining of PBMCs collected on D7 and the frequency of Neutrophils (Ly6G<sup>+</sup>CD11b<sup>+</sup>CD3<sup>+</sup>CD19<sup>-</sup>) of the CD45.2<sup>+</sup> immune compartment is shown for D7 and D12 PBMCs. (B) Mouse survival is shown. Data (n=6-7/group) were pooled from 2 independent experiments. Blood data (n=5-7/group) was analyzed as a one-way ANOVA with Tukey's multiple comparison test of the AUC. Survival data were analyzed via a Log Rank test. Error bars represent mean  $\pm$  SD.

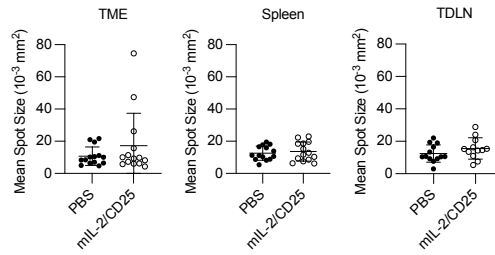

**Fig. S7. HD mIL-2/CD25 does not increase the levels of IFN $\gamma$  made on a per CD8 $^+$  T cellular basis.** Mean spot size is shown for the IFN $\gamma$  ELISpot experiments from Fig. 5. ELISpot data (n=12-14/group) were pooled from 5 independent experiments and analyzed by Mann-Whitney test. Error bars represent mean  $\pm$  SD.

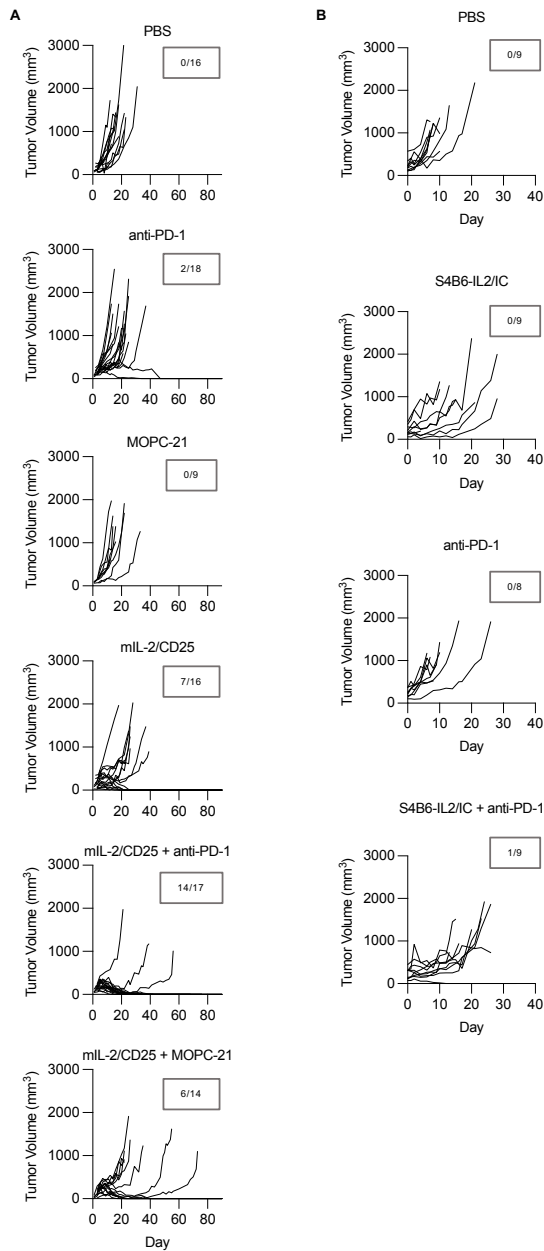

**Fig. S8. HD mIL-2/CD25 combined with PD-1 blockade supports higher inhibition of tumor progression.** (A) Tumor growth is shown for the mIL-2/CD25 and anti-PD-1 experiments in Fig 7A. (B) Tumor growth is shown for the S4B6-IL2/IC and anti-PD-1 experiment in Fig 7C.



**Supplementary Table 1.** List of fluorochrome-labeled, biotin-labeled monoclonal antibodies, and fluorochrome-streptavidin conjugates used for flow cytometry in this study, along with source and staining concentration.

| Antigen      | Clone    | Fluorophore     | Concentration | Company        | Cat. No.   |
|--------------|----------|-----------------|---------------|----------------|------------|
| CD45.2       | 104      | APC             | 1:100         | BioLegend      | 109814     |
| CD45.2       | 104      | APC-Cy7         | 1:100         | Invitrogen     | 10-0454-81 |
| CD45.2       | 104      | Biotin          | 1:100         | BD Biosciences | 558702     |
| CD3          | 17A2     | AlexaFluor700   | 1:100         | Invitrogen     | 56-0032-82 |
| CD3          | 17A2     | BV750           | 1:100         | BioLegend      | 100249     |
| CD3          | 145-2C11 | FITC            | 1:150         | Invitrogen     | 11-0031-82 |
| CD4          | RM4-5    | BV510           | 1:100         | BioLegend      | 100553     |
| CD8 $\alpha$ | 53-6.7   | Alexa Fluor 700 | 1:100         | Invitrogen     | 56-0081-82 |
| CD8 $\alpha$ | 53-6.7   | BV605           | 1:100         | BioLegend      | 100744     |
| CD8 $\alpha$ | 53-6.7   | BV650           | 1:100         | BioLegend      | 100742     |
| CD8 $\alpha$ | KT15     | FITC            | 1:100         | Invitrogen     | MA5-16759  |
| CD8 $\alpha$ | 53-6.7   | PerCP-Cy5.5     | 1:100         | BioLegend      | 100734     |
| CD44         | IM7      | Pacific Blue    | 1:50          | BioLegend      | 103020     |
| CD44         | IM7      | PE              | 1:300         | Invitrogen     | 12-0441-83 |
| CD44         | IM7      | Alexa Fluor 700 | 1:100         | BioLegend      | 103026     |
| CD44         | IM7      | APC-Cy7         | 1:100         | BioLegend      | 103028     |
| CD25         | PC61     | BV605           | 1:100         | BioLegend      | 103036     |
| CD25         | 3C7      | PE              | 1:100         | BioLegend      | 101904     |

|                   |             |               |       |                |            |
|-------------------|-------------|---------------|-------|----------------|------------|
| CD25              | PC61        | PE-Cy7        | 1:100 | BioLegend      | 102016     |
| CD25              | PC61        | PE-Texas Red  | 1:100 | BioLegend      | 102048     |
| CD11b             | M1/70       | FITC          | 1:100 | Invitrogen     | 11-0112-41 |
| CD11b             | M1/70       | BV650         | 1:100 | BioLegend      | 101259     |
| CD11c             | N418        | BV605         | 1:100 | BioLegend      | 117333     |
| CD19              | ID3         | BV711         | 1:200 | BD Biosciences | 563157     |
| CD19              | 6D5         | PE/Dazzle 594 | 1:200 | BioLegend      | 115554     |
| CD49b             | DX5         | PE-Cy7        | 1:50  | BioLegend      | 108922     |
| Ly6C              | AL-21       | Biotin        | 1:500 | BD Biosciences | 557359     |
| Ly6G              | 1A8         | APC-Cy7       | 1:100 | BioLegend      | 127624     |
| Gr-1              | RB6-8C5     | FITC          | 1:100 | BioLegend      | 108406     |
| MHC CII (I-A/I-E) | M5/114.15.2 | PerCP-Cy5.5   | 1:200 | BioLegend      | 107626     |
| NK1.1             | PK136       | PE            | 1:100 | BioLegend      | 108708     |
| PD-1 (CD279)      | J43         | BV421         | 1:50  | BD Biosciences | 565942     |
| PD-1 (CD279)      | RMP1-14     | PE            | 1:100 | BioLegend      | 114118     |
| PD-1 (CD279)      | RMP1-30     | Biotin        | 1:100 | BioLegend      | 109106     |
| LAG-3 (CD223)     | C9B7W       | PerCP-Cy5.5   | 1:40  | BD Biosciences | 564673     |
| Streptavidin      | N/A         | BV605         | 1:100 | BioLegend      | 405229     |
| Streptavidin      | N/A         | PE-CF594      | 1:100 | BD Biosciences | 562284     |
| Streptavidin      | N/A         | PE-Cy7        | 1:100 | Invitrogen     | 25-4317-82 |

|                         |          |                 |       |                |            |
|-------------------------|----------|-----------------|-------|----------------|------------|
| Foxp3                   | FJK-16s  | eFluor 450      | 1:200 | Invitrogen     | 48-5773-82 |
| Foxp3                   | FJK-16s  | PerCP-Cy5.5     | 1:100 | Invitrogen     | 45-5773-82 |
| Foxp3                   | FJK-16s  | PE-Cy7          | 1:100 | Invitrogen     | 25-5773-82 |
| Foxp3                   | FJK-16s  | Alexa Fluor 488 | 1:100 | Invitrogen     | 53-5773-82 |
| Ki67                    | B56      | Alexa Fluor 700 | 1:50  | BD Biosciences | 561277     |
| TOX                     | TXRX10   | eFluor 660      | 1:40  | Invitrogen     | 50-6502-82 |
| TCF1                    | S33-966  | PE              | 1:50  | BD Biosciences | 564217     |
| Granzyme B              | GB11     | Alexa Fluor 647 | 1:50  | BD Biosciences | 560212     |
| TNF $\alpha$            | MP6-XT22 | PerCP-Cy5.5     | 1:100 | BioLegend      | 506322     |
| IL-2                    | JES6-5H4 | PE-Cy7          | 1:20  | Invitrogen     | 25-7021-82 |
| IL-2                    | JES6-5H4 | PE              | 1:100 | BioLegend      | 503808     |
| IFN $\gamma$            | XMG1.2   | PE/Dazzle 594   | 1:100 | BioLegend      | 505846     |
| Fixable Viability Dye   | N/A      | eFluor 455UV    | 1:100 | Invitrogen     | 65-0868-18 |
| Fixable Viability Stain | N/A      | 440UV           | 1:100 | BD Biosciences | 566332     |
| AH1 Tet                 | N/A      | APC             | 1:150 | N/A            | N/A        |
| AH1 Tet                 | N/A      | BV421           | 1:150 | N/A            | N/A        |
| Neg control Tet         | N/A      | PE              | 1:150 | N/A            | N/A        |
